# Supplementary material for: Targeted transcriptome analysis using synthetic long read sequencing uncovers isoform reprograming in the progression of colon cancer
Source: PubMed Central journal article supplement (PMC8079361; doi:10.1038/s42003-021-02024-1), 2021-04-27
Supplement: 42003_2021_2024_MOESM3_ESM.pdf [file 42003_2021_2024_MOESM3_ESM.pdf]

## Description of Additional Supplementary Files

**File Name:** Supplementary Data 1

**Description:** Sequencing error of LoopSeq and Illumina on ERCC sample. S1A: Sequencing error per site. S1B: Pearson correlation comparing LoopSeq and Illumina sequencing error.

**File Name:** Supplementary Data 2

**Description:** Target sequence selection.

**File Name:** Supplementary Data 3

**Description:** Gene short-read count.

**File Name:** Supplementary Data 4

**Description:** Differentially expressed genes.

**File Name:** Supplementary Data 5

**Description:** Differentially expressed isoforms.

**File Name:** Supplementary Data 6

**Description:** Differentially expressed genes and isoforms.

**File Name:** Supplementary Data 7

**Description:** Total SNVs identified in colon cancer samples.

**File Name:** Supplementary Data 8

**Description:** Unevenly distributed SNV isoforms within a gene.

**File Name:** Supplementary Data 9

**Description:** Differential expression of SNV isoforms compared with wild type counterparts.

**File Name:** Supplementary Data 10

**Description:** SNV isoform validation via targeted RNA sequencing. S10A: Gene FAM104A. S10B: Gene PABPC1.

**File Name:** Supplementary Data 11

**Description:** Switching SNV isoforms between tumor and metastasis.

**File Name:** Supplementary Data 12

**Description:** Colon cancer related mutations/SNVs.

**File Name:** Supplementary Data 13

**Description:** Supporting reads for novel fusion detection. S13A: Summary table. S13B: STAMBPL1 - FAS (1M). S13C: STAMBPL1 - FAS (2M). S13D: SMYD3 – ZNF124 (3L). S13E: ECHDC1 – PTPRK (3T). S13F: ECHDC1 – PTPRK (3L).

**File Name:** Supplementary Data 14

**Description:** LoopSeq targeted sequencing on-target rate.

**File Name:** Supplementary Data 15

**Description:** Primers and probes design.
